# Supplementary material for: Simultaneous and ultrasensitive detection of multiple microRNAs by single-molecule fluorescence imaging
Source: PubMed Central journal article supplement — Chem Sci. 2020 Mar 24;11(15):3812–9. doi: 10.1039/d0sc00580k (PMC8152581; doi:10.1039/d0sc00580k), 2020-03-24
Supplement: SC-011-D0SC00580K-s001.pdf [file SC-011-D0SC00580K-s001.pdf]

## Supplementary information

### Simultaneous and ultrasensitive detection of multiple microRNAs by single molecule fluorescence imaging

Hongding Zhang,<sup>†a,b</sup> Xuedong Huang,<sup>†a</sup> Jianwei Liu,<sup>\*a</sup> Baohong Liu<sup>\*a</sup>

<sup>a</sup> *Department of Chemistry, Shanghai Stomatological Hospital, State Key Laboratory of Molecular Engineering of Polymers and Institute of Biomedical Sciences, Fudan University, Shanghai 200433, P. R. China*

<sup>b</sup> *College of Chemistry and Chemical Engineering, Xinyang Normal University, Xinyang 464000, P. R. China*

#### **\*Corresponding author**

Baohong Liu, Email: [bhliu@fudan.edu.cn](mailto:bhliu@fudan.edu.cn), Fax: +86-21-65641740

Jianwei Liu, Email: [jianweiliu@fudan.edu.cn](mailto:jianweiliu@fudan.edu.cn).

#### **Table of content:**

Supporting Figures S1-4, Table S1.

<sup>†</sup> These authors have contributed equally to this work.

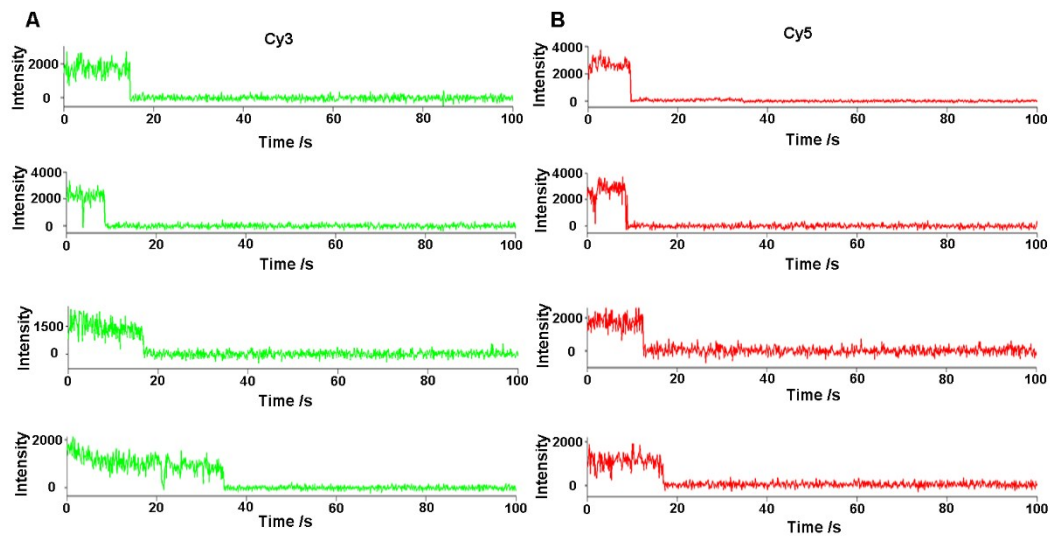

**Fig. S1** Represents traces of Cy3 (A) and Cy5 (B).

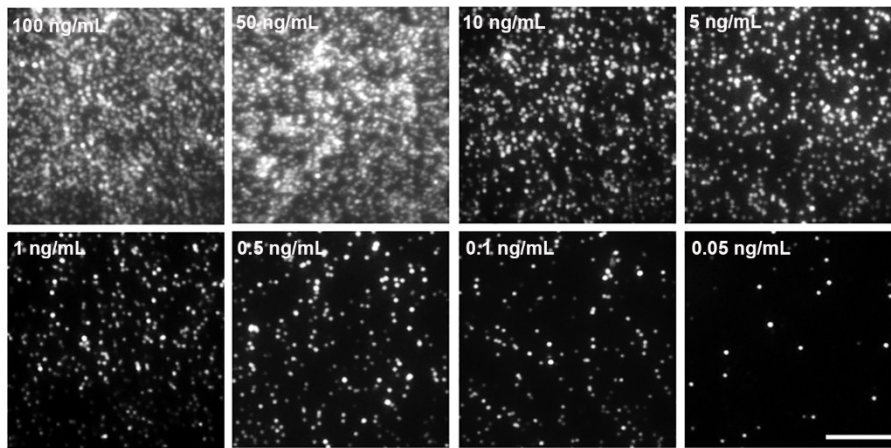

**Fig. S2** Effect of the S9.6 antibody concentration (from 100 ng/mL to 0.05 ng/mL) on the assay. Scale bar represents 5  $\mu$ m.

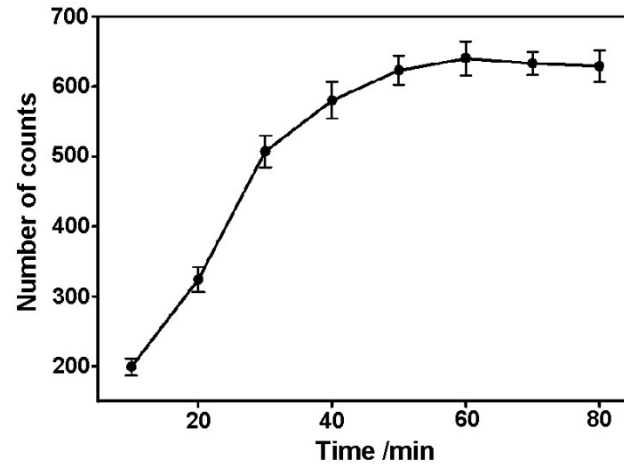

**Fig. S3** Optimization of the binding time of IgG and S9.6 antibody.

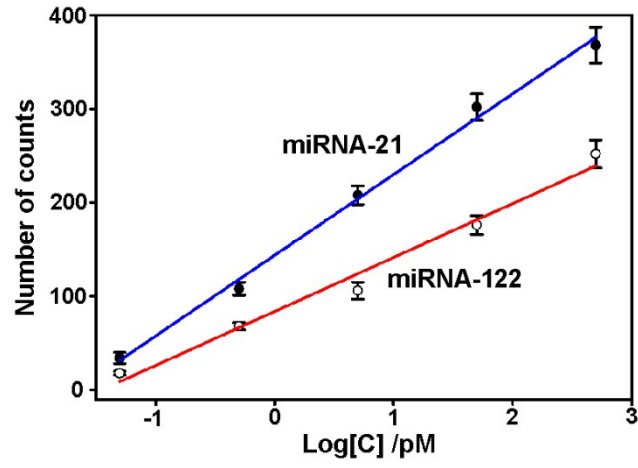

**Fig. S4** Simultaneous detection of miRNA-21 and miRNA-122 with different levels.

**Table S1** Nucleotide sequences of miRNAs and cDNAs used in this assay.

| Name                                             | Sequence (5'-3')                  |
|--------------------------------------------------|-----------------------------------|
| miRNA-21                                         | UAG CUU AUC AGA CUG AUG UUG A     |
| miRNA-122                                        | UGG AGU GUG ACA AUG GUG UUU G     |
| Single-base mismatch<br>miRNA-21 (SM miRNA-21)   | UAG CUU AUC AGA CUG AUG AUG A     |
| Single-base mismatch<br>miRNA-122 (SM miRNA-122) | UGG AGU GAG ACA AUG GUG UUU G     |
| Three-base mismatch<br>miRNA-21(TM miRNA-122)    | UAA CUU AUC AGA AUG AUG UAG A     |
| Three-base mismatch<br>miRNA-122 (TM miRNA-122)  | UGG UGU GUG AGA AUG GUA UUU G     |
| miRNA-143                                        | UGA GAU GAA GCA CUG UAG CUC A     |
| miRNA-141                                        | UAA CAC UGU CUG GUA AAG AUG G     |
| miRNA-16                                         | UAG CAG CAC GUA AAU AUU GGC G     |
| cDNA1                                            | Cy3-TCA ACA TCA GTC TGA TAA GCT A |
| cDNA2                                            | Cy5-C AAA CAC CAT TGT CAC ACT CCA |
